# Supplementary material
Source: publisher figshare collection journal article supplement (https://acs.figshare.com/ndownloader/files/3757696)
Supplement: Supplementary file 1 [file 3757696]

## Sheet: Sheet1
Compound		SMILE							RXRα binding Kd (nM)			RXRα activation EC 50 (nM)			Increase in serum triglyceride			reduction in cancer number &weight
9-cis-RA		CC1(C)C(/C=C/C(C)=C\C=C\C(C)=C\C(O)=O)=C(C)CCC1							14 ± 3			120±30			3.26			0.65	0.9
Bexarotene		CC(CCC1(C)C)(C)C2=C1C=C(C)C(C(C3=CC=C(C(O)=O)C=C3)=C)=C2							26±3			40±3			4.56			0.7	0.76
UAB30		C/C(/C=C(CCC1)/C2=C1C=CC=C2)=C/C=C/C(C)=C/C(O)=O							33±5			820±70			0.63			0.63	0.76
1		C/C(/C=C(CCC1C)/C2=C1C=CC=C2)=C/C=C/C(C)=C/C(O)=O							25±5			120±5			5.6			0.78	0.72
2		C/C(/C=C(CCC1)/C2=C1C(C)=CC=C2)=C/C=C/C(C)=C/C(O)=O							18±3			720±20			0.31			0	0
3		C/C(/C=C(CCC1)/C2=C1C=C(C)C=C2)=C/C=C/C(C)=C/C(O)=O							15±2			100±30			0.51			0.1	>10%
4		C/C(/C=C(CCC1)/C2=C1C=CC(C)=C2)=C/C=C/C(C)=C/C(O)=O							8±2			160±10			6.42			0.61	0.51
5		C/C(/C=C(CCC1)/C2=C1C=CC=C2C)=C/C=C/C(C)=C/C(O)=O							10±1			620±50			0.59			0	0
6		C/C(/C=C(CCCC1)/C2=C1C=CC=C2)=C/C=C/C(C)=C/C(O)=O							9±3			30±5			1.75			0.3	0.33
7		C/C(/C=C1C(C(C)C)=C(C2CC2)CCC/1)=C/C=C/C(C)=C/C(O)=O							34±10			50±5			2.89			0.43	0.32
8		C/C(/C=C1C(C(C)C)=C(C2=CC=CC=C2)CCC/1)=C/C=C/C(C)=C/C(O)=O							125±25			215±30			0.06			0.15	0.21
9		C/C(/C=C(CCC1)/C(CCC(C)C)=C1CC)=C/C=C/C(C)=C/C(O)=O							14±3			23±5			3.41			0.69	0.86
10		C/C(/C=C1C(CCC(C)C)=C(C2CC2)CCC/1)=C/C=C/C(C)=C/C(O)=O							35±4			19±5			0.71			0.62	0.64
11		C/C(/C=C1C(CCC(C)C)=C(C(C)C)CCC/1)=C/C=C/C(C)=C/C(O)=O							9±3			22±5			4.3			0.99	0.96
12		C/C(/C=C1C(CCC(C)C)=C(C2=CC=CC=C2)CCC/1)=C/C=C/C(C)=C/C(O)=O							150±10			80±15			0.76			0.01	27%↑
